# Supplementary material for: Identification of Gene and MicroRNA Signatures for Oral Cancer Developed from Oral Leukoplakia
Source: Biomed Res Int. 2015 May 3;2015:841956. doi: 10.1155/2015/841956 (PMC4433644; doi:10.1155/2015/841956)
Supplement: Supplementary file 1 — supplementary Table 1: Results of the functional enrichment analysis for the genes from each one of the 13 modules identified by us associated with oral cancer development. supplementary Table 2: 33 genes in the 13 modules identified by us associated with oral cancer development and their relevance score representing correlation degree with SCC provided by GeneCards. [file 841956.f1.zip]

Archive with 3 entries (2 files):
- mat.841956.v2/
- mat.841956.v2/supplementary table 1.xlsx
- mat.841956.v2/supplementary table 2.xlsx
