# Supplementary material for: Identification of Gene and MicroRNA Signatures for Oral Cancer Developed from Oral Leukoplakia
Source: Biomed Res Int. 2015 May 3;2015:841956. doi: 10.1155/2015/841956 (PMC4433644; doi:10.1155/2015/841956)
Supplement: Supplementary file 1 — supplementary Table 1: Results of the functional enrichment analysis for the genes from each one of the 13 modules identified by us associated with oral cancer development. supplementary Table 2: 33 genes in the 13 modules identified by us associated with oral cancer development and their relevance score representing correlation degree with SCC provided by GeneCards. [file 841956.f1.zip › mat.841956.v2/supplementary table 1.xlsx]

## Sheet: modules
	genes in MAOCs
module 1	DPM3 DPM1 DPM2
module 2	HIRA HIST2H2BE HIRIP3
module 3	EGFR PDGFRB PTPN11 SHC1 SRC STAT5A STAT5B CBL
module 4	CSNK2A1 NCL TOP1 TP53
module 5	NR3C1 POU2F1 RARA STAT5A STAT5B NCOR2
module 6	LRP1 SKIL SNX17
module 7	GNB2 GNG4 RAF1
module 8	EGFR INSR LEPR PDGFRA PDGFRB SNX6 SNX1 SNX2 SNX4 ACVR1B ACVR2B
module 9	EGFR JAK2 PDGFRB PTPN2 PTPN11 SRC STAT1 STAT3 STAT5A STAT5B
module 10	SIRT1 HEY2 HES1
module 11	WNT4 SFRP1 FZD6
module 12	PABPC1 HNRNPD PCBP1 PCBP2
module 13	PRKACA RAF1 RAP1A BRAF

## Sheet: module_1
GO term			KEGG pathway
Term	Benjamini		Term	Benjamini
GO:0018211~peptidyl-tryptophan modification	1.04922e-06		hsa00510:N-Glycan biosynthesis	0.000160135
GO:0018317~protein amino acid C-linked glycosylation via tryptophan	1.04922e-06
GO:0018406~protein amino acid C-linked glycosylation via 2'-alpha-mannosyl-L-tryptophan	1.04922e-06
GO:0018103~protein amino acid C-linked glycosylation	1.04922e-06
GO:0035269~protein amino acid O-linked mannosylation	1.04922e-06
GO:0035268~protein amino acid mannosylation	1.04922e-06
GO:0006493~protein amino acid O-linked glycosylation	5.24597e-05
GO:0006506~GPI anchor biosynthetic process	6.53994e-05
GO:0006505~GPI anchor metabolic process	5.20226e-05
GO:0046489~phosphoinositide biosynthetic process	5.45581e-05
GO:0006497~protein amino acid lipidation	8.03209e-05
GO:0042158~lipoprotein biosynthetic process	8.25859e-05
GO:0046474~glycerophospholipid biosynthetic process	9.95847e-05
GO:0030384~phosphoinositide metabolic process	0.00010212
GO:0042157~lipoprotein metabolic process	0.000110514
GO:0045017~glycerolipid biosynthetic process	0.000110514
GO:0008654~phospholipid biosynthetic process	0.000163765
GO:0006650~glycerophospholipid metabolic process	0.000201175
GO:0070085~glycosylation	0.000218654
GO:0006486~protein amino acid glycosylation	0.000218654
GO:0043413~biopolymer glycosylation	0.000218654
GO:0009101~glycoprotein biosynthetic process	0.000309817
GO:0046486~glycerolipid metabolic process	0.000304039
GO:0006644~phospholipid metabolic process	0.000392435
GO:0019637~organophosphate metabolic process	0.000409362
GO:0009100~glycoprotein metabolic process	0.000394414
GO:0008610~lipid biosynthetic process	0.000957051

## Sheet: module_2
GO term			KEGG pathway
Term	Benjamini
GO:0006325~chromatin organization	0.0177587
GO:0051276~chromosome organization	0.014653
GO:0006333~chromatin assembly or disassembly	0.134661

## Sheet: module_3
GO term			KEGG pathway
Term	Benjamini		Term	Benjamini
GO:0007169~transmembrane receptor protein tyrosine kinase signaling pathway	1.47401e-10		hsa04012:ErbB signaling pathway	9.348e-07
GO:0007167~enzyme linked receptor protein signaling pathway	1.47275e-09		hsa05220:Chronic myeloid leukemia	2.58676e-05
GO:0007173~epidermal growth factor receptor signaling pathway	4.36713e-05		hsa05200:Pathways in cancer	0.00592425
GO:0007243~protein kinase cascade	3.54448e-05		hsa04630:Jak-STAT signaling pathway	0.0077478
GO:0007166~cell surface receptor linked signal transduction	8.58925e-05		hsa04510:Focal adhesion	0.0131762
GO:0006468~protein amino acid phosphorylation	0.000438383		hsa05214:Glioma	0.0176507
GO:0010033~response to organic substance	0.000551321		hsa05120:Epithelial cell signaling in Helicobacter pylori infection	0.0175936
GO:0016310~phosphorylation	0.000804084		hsa04540:Gap junction	0.0260204
GO:0009725~response to hormone stimulus	0.000920344		hsa04144:Endocytosis	0.0910783
GO:0009719~response to endogenous stimulus	0.0012217		hsa05221:Acute myeloid leukemia	0.245139
GO:0008284~positive regulation of cell proliferation	0.00121112		hsa05218:Melanoma	0.269016
GO:0032870~cellular response to hormone stimulus	0.00124719
GO:0006796~phosphate metabolic process	0.00129019
GO:0006793~phosphorus metabolic process	0.00129019
GO:0007242~intracellular signaling cascade	0.00414035
GO:0018108~peptidyl-tyrosine phosphorylation	0.00739893
GO:0018212~peptidyl-tyrosine modification	0.00755553
GO:0042127~regulation of cell proliferation	0.00958429
GO:0045787~positive regulation of cell cycle	0.00947273
GO:0040014~regulation of multicellular organism growth	0.0102759
GO:0051726~regulation of cell cycle	0.0111325
GO:0042698~ovulation cycle	0.0112114
GO:0040008~regulation of growth	0.0110445
GO:0046544~development of secondary male sexual characteristics	0.0211081
GO:0051272~positive regulation of cell motion	0.0208319
GO:0043406~positive regulation of MAP kinase activity	0.0216439
GO:0042325~regulation of phosphorylation	0.0231084
GO:0019220~regulation of phosphate metabolic process	0.0249638
GO:0051174~regulation of phosphorus metabolic process	0.0249638
GO:0032504~multicellular organism reproduction	0.0243685
GO:0048609~reproductive process in a multicellular organism	0.0243685
GO:0001553~luteinization	0.0250617
GO:0032823~regulation of natural killer cell differentiation	0.0250617
GO:0032825~positive regulation of natural killer cell differentiation	0.0250617
GO:0046449~creatinine metabolic process	0.0250617
GO:0046543~development of secondary female sexual characteristics	0.0250617
GO:0048511~rhythmic process	0.0281932
GO:0048732~gland development	0.0302801
GO:0030155~regulation of cell adhesion	0.0301999
GO:0001779~natural killer cell differentiation	0.0293027
GO:0060397~JAK-STAT cascade involved in growth hormone signaling pathway	0.0293027
GO:0006549~isoleucine metabolic process	0.0293027
GO:0000255~allantoin metabolic process	0.0293027
GO:0043405~regulation of MAP kinase activity	0.0300875
GO:0007346~regulation of mitotic cell cycle	0.0338321
GO:0045647~negative regulation of erythrocyte differentiation	0.0335049
GO:0006573~valine metabolic process	0.0335049
GO:0019530~taurine metabolic process	0.0335049
GO:0045136~development of secondary sexual characteristics	0.0335049
GO:0043434~response to peptide hormone stimulus	0.0328553
GO:0048537~mucosal-associated lymphoid tissue development	0.0380029
GO:0045586~regulation of gamma-delta T cell differentiation	0.0380029
GO:0048541~Peyer's patch development	0.0380029
GO:0045588~positive regulation of gamma-delta T cell differentiation	0.0380029
GO:0046645~positive regulation of gamma-delta T cell activation	0.0380029
GO:0046643~regulation of gamma-delta T cell activation	0.0380029
GO:0051173~positive regulation of nitrogen compound metabolic process	0.038842
GO:0032814~regulation of natural killer cell activation	0.0420337
GO:0045579~positive regulation of B cell differentiation	0.0420337
GO:0032816~positive regulation of natural killer cell activation	0.0420337
GO:0006101~citrate metabolic process	0.0420337
GO:0000165~MAPKKK cascade	0.0418859
GO:0031328~positive regulation of cellular biosynthetic process	0.042934
GO:0009891~positive regulation of biosynthetic process	0.0436882
GO:0051270~regulation of cell motion	0.0428435
GO:0048011~nerve growth factor receptor signaling pathway	0.042688
GO:0060396~growth hormone receptor signaling pathway	0.042688
GO:0006600~creatine metabolic process	0.0468796
GO:0006599~phosphagen metabolic process	0.0468796
GO:0042104~positive regulation of activated T cell proliferation	0.0468796
GO:0006105~succinate metabolic process	0.0468796
GO:0060416~response to growth hormone stimulus	0.0468796
GO:0042592~homeostatic process	0.0496746
GO:0006107~oxaloacetate metabolic process	0.0498429
GO:0006103~2-oxoglutarate metabolic process	0.0498429
GO:0045860~positive regulation of protein kinase activity	0.0508388
GO:0033674~positive regulation of kinase activity	0.0533047
GO:0048584~positive regulation of response to stimulus	0.0544576
GO:0042981~regulation of apoptosis	0.0543354
GO:0046006~regulation of activated T cell proliferation	0.0540538
GO:0045931~positive regulation of mitotic cell cycle	0.0540538
GO:0045885~positive regulation of survival gene product expression	0.0540538
GO:0051347~positive regulation of transferase activity	0.0531823
GO:0043067~regulation of programmed cell death	0.0528703
GO:0010941~regulation of cell death	0.0524808
GO:0051240~positive regulation of multicellular organismal process	0.0520644
GO:0045086~positive regulation of interleukin-2 biosynthetic process	0.0535269
GO:0002717~positive regulation of natural killer cell mediated immunity	0.0644005
GO:0045577~regulation of B cell differentiation	0.0644005
GO:0009081~branched chain family amino acid metabolic process	0.0644005
GO:0045954~positive regulation of natural killer cell mediated cytotoxicity	0.0644005
GO:0002715~regulation of natural killer cell mediated immunity	0.0671884
GO:0042269~regulation of natural killer cell mediated cytotoxicity	0.0671884
GO:0001775~cell activation	0.06622
GO:0019915~lipid storage	0.0687899
GO:0045646~regulation of erythrocyte differentiation	0.0687899
GO:0048008~platelet-derived growth factor receptor signaling pathway	0.071364
GO:0045076~regulation of interleukin-2 biosynthetic process	0.071364
GO:0045884~regulation of survival gene product expression	0.0773998
GO:0030101~natural killer cell activation	0.0773998
GO:0001912~positive regulation of leukocyte mediated cytotoxicity	0.0773998
GO:0043029~T cell homeostasis	0.0773998
GO:0010647~positive regulation of cell communication	0.080354
GO:0031343~positive regulation of cell killing	0.0854177
GO:0045859~regulation of protein kinase activity	0.085218
GO:0040018~positive regulation of multicellular organism growth	0.0863209
GO:0001910~regulation of leukocyte mediated cytotoxicity	0.0863209
GO:0043066~negative regulation of apoptosis	0.0868831
GO:0043549~regulation of kinase activity	0.0870389
GO:0043069~negative regulation of programmed cell death	0.086755
GO:0060548~negative regulation of cell death	0.0860428
GO:0033077~T cell differentiation in the thymus	0.0868241
GO:0002260~lymphocyte homeostasis	0.0887348
GO:0007595~lactation	0.0887348
GO:0031341~regulation of cell killing	0.0887348
GO:0051338~regulation of transferase activity	0.0878959
GO:0030856~regulation of epithelial cell differentiation	0.0894539
GO:0045638~negative regulation of myeloid cell differentiation	0.0912514
GO:0032663~regulation of interleukin-2 production	0.0912514
GO:0050729~positive regulation of inflammatory response	0.0912514
GO:0048661~positive regulation of smooth muscle cell proliferation	0.0929995
GO:0045582~positive regulation of T cell differentiation	0.0947003
GO:0050871~positive regulation of B cell activation	0.0963558
GO:0002705~positive regulation of leukocyte mediated immunity	0.0979677
GO:0043648~dicarboxylic acid metabolic process	0.0979677
GO:0002708~positive regulation of lymphocyte mediated immunity	0.0979677
GO:0045621~positive regulation of lymphocyte differentiation	0.0995377
GO:0019218~regulation of steroid metabolic process	0.101067
GO:0001776~leukocyte homeostasis	0.101067
GO:0042102~positive regulation of T cell proliferation	0.1078
GO:0007259~JAK-STAT cascade	0.1078
GO:0002699~positive regulation of immune effector process	0.119441
GO:0048660~regulation of smooth muscle cell proliferation	0.123171
GO:0045089~positive regulation of innate immune response	0.123171
GO:0042108~positive regulation of cytokine biosynthetic process	0.126801
GO:0050864~regulation of B cell activation	0.132765
GO:0045580~regulation of T cell differentiation	0.132765
GO:0043085~positive regulation of catalytic activity	0.136769
GO:0045088~regulation of innate immune response	0.137128
GO:0002706~regulation of lymphocyte mediated immunity	0.137128
GO:0050671~positive regulation of lymphocyte proliferation	0.138064
GO:0032946~positive regulation of mononuclear cell proliferation	0.13898
GO:0043603~cellular amide metabolic process	0.13898
GO:0070665~positive regulation of leukocyte proliferation	0.13898
GO:0002703~regulation of leukocyte mediated immunity	0.148942
GO:0042129~regulation of T cell proliferation	0.149713
GO:0022602~ovulation cycle process	0.149713
GO:0030879~mammary gland development	0.150467
GO:0045619~regulation of lymphocyte differentiation	0.150467
GO:0008585~female gonad development	0.151205
GO:0032103~positive regulation of response to external stimulus	0.151205
GO:0030217~T cell differentiation	0.151927
GO:0044093~positive regulation of molecular function	0.154198
GO:0050730~regulation of peptidyl-tyrosine phosphorylation	0.155432
GO:0046545~development of primary female sexual characteristics	0.156088
GO:0046660~female sex differentiation	0.156088
GO:0045637~regulation of myeloid cell differentiation	0.15673
GO:0019221~cytokine-mediated signaling pathway	0.15673
GO:0031349~positive regulation of defense response	0.161424
GO:0046661~male sex differentiation	0.161424
GO:0042035~regulation of cytokine biosynthetic process	0.161999
GO:0045935~positive regulation of nucleobase, nucleoside, nucleotide and nucleic acid metabolic process	0.162764
GO:0050870~positive regulation of T cell activation	0.163115
GO:0050727~regulation of inflammatory response	0.163115
GO:0045927~positive regulation of growth	0.169477
GO:0000187~activation of MAPK activity	0.171863
GO:0010557~positive regulation of macromolecule biosynthetic process	0.170437
GO:0050670~regulation of lymphocyte proliferation	0.170873
GO:0032944~regulation of mononuclear cell proliferation	0.171321
GO:0070663~regulation of leukocyte proliferation	0.171321
GO:0046777~protein amino acid autophosphorylation	0.171761
GO:0030335~positive regulation of cell migration	0.17765
GO:0051251~positive regulation of lymphocyte activation	0.190506
GO:0040017~positive regulation of locomotion	0.19076
GO:0048872~homeostasis of number of cells	0.192746
GO:0002697~regulation of immune effector process	0.192976
GO:0030098~lymphocyte differentiation	0.194905
GO:0007265~Ras protein signal transduction	0.196797
GO:0002696~positive regulation of leukocyte activation	0.196987
GO:0042445~hormone metabolic process	0.196987
GO:0007565~female pregnancy	0.202122
GO:0050867~positive regulation of cell activation	0.202264
GO:0019216~regulation of lipid metabolic process	0.202404
GO:0008406~gonad development	0.202404
GO:0032844~regulation of homeostatic process	0.204144
GO:0006790~sulfur metabolic process	0.204266
GO:0050863~regulation of T cell activation	0.20596
GO:0042110~T cell activation	0.218448
GO:0048608~reproductive structure development	0.218448
GO:0045137~development of primary sexual characteristics	0.218455
GO:0002521~leukocyte differentiation	0.222986
GO:0010604~positive regulation of macromolecule metabolic process	0.22813
GO:0050778~positive regulation of immune response	0.240509
GO:0051249~regulation of lymphocyte activation	0.243223
GO:0007548~sex differentiation	0.245887
GO:0010817~regulation of hormone levels	0.245887
GO:0010876~lipid localization	0.252698
GO:0032101~regulation of response to external stimulus	0.253842
GO:0002694~regulation of leukocyte activation	0.261787
GO:0006575~cellular amino acid derivative metabolic process	0.261787
GO:0030334~regulation of cell migration	0.264181
GO:0001932~regulation of protein amino acid phosphorylation	0.267862
GO:0050865~regulation of cell activation	0.268844
GO:0001817~regulation of cytokine production	0.275017
GO:0040012~regulation of locomotion	0.287414
GO:0048545~response to steroid hormone stimulus	0.287414
GO:0006631~fatty acid metabolic process	0.293225
GO:0046649~lymphocyte activation	0.292737

## Sheet: module_4
GO term			KEGG pathway
Term	Benjamini		Term	Benjamini
GO:0042493~response to drug	0.999986		hsa04310:Wnt signaling pathway	0.76475

## Sheet: module_5
GO term			KEGG pathway
Term	Benjamini		Term	Benjamini
GO:0019218~regulation of steroid metabolic process	0.00448429		hsa05221:Acute myeloid leukemia	0.00603251
GO:0006350~transcription	0.00490782		hsa05200:Pathways in cancer	0.0881852
GO:0045621~positive regulation of lymphocyte differentiation	0.00529258		hsa04012:ErbB signaling pathway	0.128987
GO:0045582~positive regulation of T cell differentiation	0.00588346		hsa05220:Chronic myeloid leukemia	0.146615
GO:0045580~regulation of T cell differentiation	0.00646181
GO:0051252~regulation of RNA metabolic process	0.0070318
GO:0045619~regulation of lymphocyte differentiation	0.00863621
GO:0045449~regulation of transcription	0.00950169
GO:0050870~positive regulation of T cell activation	0.0100561
GO:0006355~regulation of transcription, DNA-dependent	0.0125427
GO:0051251~positive regulation of lymphocyte activation	0.0148539
GO:0046544~development of secondary male sexual characteristics	0.0150428
GO:0019216~regulation of lipid metabolic process	0.0155425
GO:0050863~regulation of T cell activation	0.015823
GO:0002696~positive regulation of leukocyte activation	0.016242
GO:0050867~positive regulation of cell activation	0.0164341
GO:0048732~gland development	0.0185362
GO:0051249~regulation of lymphocyte activation	0.0198957
GO:0032823~regulation of natural killer cell differentiation	0.0200074
GO:0046449~creatinine metabolic process	0.0200074
GO:0001553~luteinization	0.0200074
GO:0032825~positive regulation of natural killer cell differentiation	0.0200074
GO:0046543~development of secondary female sexual characteristics	0.0200074
GO:0060397~JAK-STAT cascade involved in growth hormone signaling pathway	0.0208689
GO:0001779~natural killer cell differentiation	0.0208689
GO:0006549~isoleucine metabolic process	0.0208689
GO:0000255~allantoin metabolic process	0.0208689
GO:0002694~regulation of leukocyte activation	0.0215594
GO:0050865~regulation of cell activation	0.0219388
GO:0006357~regulation of transcription from RNA polymerase II promoter	0.0220192
GO:0001817~regulation of cytokine production	0.0225091
GO:0010033~response to organic substance	0.0225606
GO:0045136~development of secondary sexual characteristics	0.0230514
GO:0019530~taurine metabolic process	0.0230514
GO:0045647~negative regulation of erythrocyte differentiation	0.0230514
GO:0006573~valine metabolic process	0.0230514
GO:0046645~positive regulation of gamma-delta T cell activation	0.0265901
GO:0045588~positive regulation of gamma-delta T cell differentiation	0.0265901
GO:0048541~Peyer's patch development	0.0265901
GO:0046643~regulation of gamma-delta T cell activation	0.0265901
GO:0048537~mucosal-associated lymphoid tissue development	0.0265901
GO:0045586~regulation of gamma-delta T cell differentiation	0.0265901
GO:0032814~regulation of natural killer cell activation	0.0298648
GO:0032816~positive regulation of natural killer cell activation	0.0298648
GO:0045579~positive regulation of B cell differentiation	0.0298648
GO:0006101~citrate metabolic process	0.0298648
GO:0045597~positive regulation of cell differentiation	0.0307613
GO:0002684~positive regulation of immune system process	0.0310454
GO:0051240~positive regulation of multicellular organismal process	0.0315794
GO:0060396~growth hormone receptor signaling pathway	0.0318249
GO:0060416~response to growth hormone stimulus	0.0325375
GO:0006105~succinate metabolic process	0.0325375
GO:0006599~phosphagen metabolic process	0.0325375
GO:0006600~creatine metabolic process	0.0325375
GO:0042104~positive regulation of activated T cell proliferation	0.0325375
GO:0006103~2-oxoglutarate metabolic process	0.0350455
GO:0006107~oxaloacetate metabolic process	0.0350455
GO:0051094~positive regulation of developmental process	0.0372176
GO:0045931~positive regulation of mitotic cell cycle	0.0396274
GO:0045885~positive regulation of survival gene product expression	0.0396274
GO:0046006~regulation of activated T cell proliferation	0.0396274
GO:0045086~positive regulation of interleukin-2 biosynthetic process	0.0417256
GO:0045577~regulation of B cell differentiation	0.0497992
GO:0002717~positive regulation of natural killer cell mediated immunity	0.0497992
GO:0009081~branched chain family amino acid metabolic process	0.0497992
GO:0045954~positive regulation of natural killer cell mediated cytotoxicity	0.0497992
GO:0042269~regulation of natural killer cell mediated cytotoxicity	0.0515108
GO:0002715~regulation of natural killer cell mediated immunity	0.0515108
GO:0045944~positive regulation of transcription from RNA polymerase II promoter	0.0517327
GO:0045076~regulation of interleukin-2 biosynthetic process	0.0522005
GO:0009725~response to hormone stimulus	0.0530243
GO:0045646~regulation of erythrocyte differentiation	0.0531342
GO:0019915~lipid storage	0.0531342
GO:0007242~intracellular signaling cascade	0.0540168
GO:0043029~T cell homeostasis	0.0550529
GO:0030101~natural killer cell activation	0.0550529
GO:0001912~positive regulation of leukocyte mediated cytotoxicity	0.0550529
GO:0045884~regulation of survival gene product expression	0.0550529
GO:0009719~response to endogenous stimulus	0.0585128
GO:0031343~positive regulation of cell killing	0.0600878
GO:0001910~regulation of leukocyte mediated cytotoxicity	0.0612522
GO:0040018~positive regulation of multicellular organism growth	0.0612522
GO:0033077~T cell differentiation in the thymus	0.0646896
GO:0007595~lactation	0.0657108
GO:0002260~lymphocyte homeostasis	0.0657108
GO:0031341~regulation of cell killing	0.0657108
GO:0030856~regulation of epithelial cell differentiation	0.066691
GO:0050729~positive regulation of inflammatory response	0.0676327
GO:0045638~negative regulation of myeloid cell differentiation	0.0676327
GO:0032663~regulation of interleukin-2 production	0.0676327
GO:0051254~positive regulation of RNA metabolic process	0.0692576
GO:0045893~positive regulation of transcription, DNA-dependent	0.0694235
GO:0050871~positive regulation of B cell activation	0.0702483
GO:0002705~positive regulation of leukocyte mediated immunity	0.0710566
GO:0002708~positive regulation of lymphocyte mediated immunity	0.0710566
GO:0043648~dicarboxylic acid metabolic process	0.0710566
GO:0001776~leukocyte homeostasis	0.0738136
GO:0007259~JAK-STAT cascade	0.0784024
GO:0042102~positive regulation of T cell proliferation	0.0784024
GO:0002699~positive regulation of immune effector process	0.0852094
GO:0045941~positive regulation of transcription	0.0855308
GO:0045089~positive regulation of innate immune response	0.0861707
GO:0010628~positive regulation of gene expression	0.087516
GO:0042108~positive regulation of cytokine biosynthetic process	0.0883906
GO:0050864~regulation of B cell activation	0.0922644
GO:0030518~steroid hormone receptor signaling pathway	0.0932441
GO:0034754~cellular hormone metabolic process	0.0935408
GO:0045935~positive regulation of nucleobase, nucleoside, nucleotide and nucleic acid metabolic process	0.0939262
GO:0051173~positive regulation of nitrogen compound metabolic process	0.0940165
GO:0030217~T cell differentiation	0.0940321
GO:0010557~positive regulation of macromolecule biosynthetic process	0.0941118
GO:0045787~positive regulation of cell cycle	0.0942021
GO:0002706~regulation of lymphocyte mediated immunity	0.0946208
GO:0045088~regulation of innate immune response	0.0946208
GO:0032355~response to estradiol stimulus	0.0946208
GO:0031328~positive regulation of cellular biosynthetic process	0.0948181
GO:0008585~female gonad development	0.0949107
GO:0032103~positive regulation of response to external stimulus	0.0949107
GO:0050671~positive regulation of lymphocyte proliferation	0.0949226
GO:0009891~positive regulation of biosynthetic process	0.0950146
GO:0043603~cellular amide metabolic process	0.0952156
GO:0032946~positive regulation of mononuclear cell proliferation	0.0952156
GO:0070665~positive regulation of leukocyte proliferation	0.0952156
GO:0040014~regulation of multicellular organism growth	0.0953197
GO:0002703~regulation of leukocyte mediated immunity	0.0953197
GO:0042129~regulation of T cell proliferation	0.0955806
GO:0022602~ovulation cycle process	0.0955806
GO:0042698~ovulation cycle	0.0956517
GO:0030879~mammary gland development	0.0958346
GO:0046545~development of primary female sexual characteristics	0.0972294
GO:0046660~female sex differentiation	0.0972294
GO:0045637~regulation of myeloid cell differentiation	0.0974425
GO:0019221~cytokine-mediated signaling pathway	0.0974425
GO:0031349~positive regulation of defense response	0.100266
GO:0046661~male sex differentiation	0.100266
GO:0042035~regulation of cytokine biosynthetic process	0.100438
GO:0030522~intracellular receptor-mediated signaling pathway	0.100606
GO:0050727~regulation of inflammatory response	0.10077
GO:0045927~positive regulation of growth	0.104661
GO:0050670~regulation of lymphocyte proliferation	0.107226
GO:0070663~regulation of leukocyte proliferation	0.107312
GO:0032944~regulation of mononuclear cell proliferation	0.107312
GO:0042981~regulation of apoptosis	0.108229
GO:0010941~regulation of cell death	0.108658
GO:0043067~regulation of programmed cell death	0.109045
GO:0010604~positive regulation of macromolecule metabolic process	0.117718
GO:0002697~regulation of immune effector process	0.120183
GO:0048872~homeostasis of number of cells	0.120238
GO:0030098~lymphocyte differentiation	0.121237
GO:0042445~hormone metabolic process	0.122196
GO:0043627~response to estrogen stimulus	0.122269
GO:0007565~female pregnancy	0.125338
GO:0008406~gonad development	0.126295
GO:0006790~sulfur metabolic process	0.127116
GO:0032844~regulation of homeostatic process	0.127233
GO:0048511~rhythmic process	0.136801
GO:0045137~development of primary sexual characteristics	0.137004
GO:0042110~T cell activation	0.137211
GO:0048608~reproductive structure development	0.137211
GO:0002521~leukocyte differentiation	0.138575
GO:0032870~cellular response to hormone stimulus	0.139338
GO:0030155~regulation of cell adhesion	0.142017
GO:0050778~positive regulation of immune response	0.148444
GO:0007346~regulation of mitotic cell cycle	0.152515
GO:0010817~regulation of hormone levels	0.152842
GO:0007548~sex differentiation	0.152842
GO:0043434~response to peptide hormone stimulus	0.153113
GO:0010876~lipid localization	0.154611
GO:0032101~regulation of response to external stimulus	0.15518
GO:0006575~cellular amino acid derivative metabolic process	0.160193
GO:0048545~response to steroid hormone stimulus	0.181594
GO:0046649~lymphocyte activation	0.184754
GO:0006631~fatty acid metabolic process	0.185315
GO:0008202~steroid metabolic process	0.185874
GO:0006916~anti-apoptosis	0.187801
GO:0045596~negative regulation of cell differentiation	0.194588
GO:0007169~transmembrane receptor protein tyrosine kinase signaling pathway	0.199612
GO:0030097~hemopoiesis	0.207687
GO:0048584~positive regulation of response to stimulus	0.207687
GO:0045321~leukocyte activation	0.210899
GO:0003006~reproductive developmental process	0.223212
GO:0048534~hemopoietic or lymphoid organ development	0.223245
GO:0002520~immune system development	0.232138

## Sheet: module_6
GO term			KEGG pathway
Term	Benjamini
GO:0006898~receptor-mediated endocytosis	0.462191
GO:0010648~negative regulation of cell communication	0.518512
GO:0009968~negative regulation of signal transduction	0.580011
GO:0016044~membrane organization	0.59456
GO:0016192~vesicle-mediated transport	0.682044
GO:0006897~endocytosis	0.726199
GO:0010324~membrane invagination	0.726199

## Sheet: module_7
GO term			KEGG pathway
Term	Benjamini		Term	Benjamini
GO:0007242~intracellular signaling cascade	0.125492		hsa04062:Chemokine signaling pathway	0.0421676
GO:0032870~cellular response to hormone stimulus	0.141997
GO:0007166~cell surface receptor linked signal transduction	0.178206
GO:0009755~hormone-mediated signaling	0.212419
GO:0009719~response to endogenous stimulus	0.269551
GO:0009725~response to hormone stimulus	0.288983

## Sheet: module_8
GO term			KEGG pathway
Term	Benjamini		Term	Benjamini
GO:0046777~protein amino acid autophosphorylation	0.000141268		hsa04060:Cytokine-cytokine receptor interaction	5.83532e-05
GO:0007167~enzyme linked receptor protein signaling pathway	0.000542976		hsa05210:Colorectal cancer	0.00121632
GO:0030335~positive regulation of cell migration	0.00506698		hsa05214:Glioma	0.0210155
GO:0040017~positive regulation of locomotion	0.00507185		hsa04010:MAPK signaling pathway	0.0182936
GO:0051272~positive regulation of cell motion	0.00507185		hsa05218:Melanoma	0.0160218
GO:0010647~positive regulation of cell communication	0.00509446		hsa04520:Adherens junction	0.0156778
GO:0006468~protein amino acid phosphorylation	0.00559465		hsa04540:Gap junction	0.017861
GO:0016310~phosphorylation	0.0095101		hsa05215:Prostate cancer	0.017861
GO:0051270~regulation of cell motion	0.012589		hsa05200:Pathways in cancer	0.0165544
GO:0030334~regulation of cell migration	0.0127676		hsa04020:Calcium signaling pathway	0.05158
GO:0006796~phosphate metabolic process	0.0128949		hsa04144:Endocytosis	0.050598
GO:0006793~phosphorus metabolic process	0.0128949		hsa04510:Focal adhesion	0.0544023
GO:0042325~regulation of phosphorylation	0.0130287		hsa04810:Regulation of actin cytoskeleton	0.0566666
GO:0040012~regulation of locomotion	0.0135188		hsa05212:Pancreatic cancer	0.173839
GO:0051174~regulation of phosphorus metabolic process	0.0136666		hsa04350:TGF-beta signaling pathway	0.193127
GO:0019220~regulation of phosphate metabolic process	0.0136666
GO:0018108~peptidyl-tyrosine phosphorylation	0.0157869
GO:0018212~peptidyl-tyrosine modification	0.016115
GO:0007169~transmembrane receptor protein tyrosine kinase signaling pathway	0.01667
GO:0007166~cell surface receptor linked signal transduction	0.023476
GO:0009967~positive regulation of signal transduction	0.0287285
GO:0010033~response to organic substance	0.0320756
GO:0001501~skeletal system development	0.0323564
GO:0045859~regulation of protein kinase activity	0.0384978
GO:0043549~regulation of kinase activity	0.0404996
GO:0016044~membrane organization	0.0428929
GO:0032927~positive regulation of activin receptor signaling pathway	0.0431368
GO:0051338~regulation of transferase activity	0.0435241
GO:0048705~skeletal system morphogenesis	0.0455432
GO:0032147~activation of protein kinase activity	0.0456336
GO:0043627~response to estrogen stimulus	0.0462609
GO:0070727~cellular macromolecule localization	0.0467787
GO:0008284~positive regulation of cell proliferation	0.0467787
GO:0008104~protein localization	0.0473672
GO:0034613~cellular protein localization	0.0474395
GO:0001932~regulation of protein amino acid phosphorylation	0.0972481
GO:0001701~in utero embryonic development	0.0974927
GO:0032925~regulation of activin receptor signaling pathway	0.0985758
GO:0048010~vascular endothelial growth factor receptor signaling pathway	0.104972
GO:0048545~response to steroid hormone stimulus	0.105352
GO:0010035~response to inorganic substance	0.1157
GO:0010324~membrane invagination	0.128214
GO:0006897~endocytosis	0.128214
GO:0045860~positive regulation of protein kinase activity	0.12823
GO:0033674~positive regulation of kinase activity	0.133417
GO:0051347~positive regulation of transferase activity	0.139603
GO:0048008~platelet-derived growth factor receptor signaling pathway	0.14758
GO:0045429~positive regulation of nitric oxide biosynthetic process	0.155047
GO:0015031~protein transport	0.15584
GO:0003006~reproductive developmental process	0.15603
GO:0045184~establishment of protein localization	0.156256
GO:0042127~regulation of cell proliferation	0.159193
GO:0051094~positive regulation of developmental process	0.159562
GO:0031399~regulation of protein modification process	0.170329
GO:0045428~regulation of nitric oxide biosynthetic process	0.173586
GO:0045740~positive regulation of DNA replication	0.176219
GO:0044092~negative regulation of molecular function	0.193062
GO:0009792~embryonic development ending in birth or egg hatching	0.193062
GO:0043009~chordate embryonic development	0.193339
GO:0060021~palate development	0.195324
GO:0009725~response to hormone stimulus	0.21898
GO:0042475~odontogenesis of dentine-containing tooth	0.221566
GO:0006886~intracellular protein transport	0.222459
GO:0009719~response to endogenous stimulus	0.249634
GO:0043410~positive regulation of MAPKKK cascade	0.24984
GO:0042476~odontogenesis	0.272458
GO:0032355~response to estradiol stimulus	0.272458
GO:0051054~positive regulation of DNA metabolic process	0.277097
GO:0000082~G1/S transition of mitotic cell cycle	0.277097
GO:0045787~positive regulation of cell cycle	0.277443
GO:0006275~regulation of DNA replication	0.293844
GO:0032268~regulation of cellular protein metabolic process	0.294683
GO:0042063~gliogenesis	0.297823
GO:0050730~regulation of peptidyl-tyrosine phosphorylation	0.301547
GO:0042698~ovulation cycle	0.301593
GO:0043085~positive regulation of catalytic activity	0.323
GO:0034097~response to cytokine stimulus	0.333038
GO:0016192~vesicle-mediated transport	0.367114
GO:0044093~positive regulation of molecular function	0.37217
GO:0042327~positive regulation of phosphorylation	0.375229
GO:0001822~kidney development	0.376228
GO:0010562~positive regulation of phosphorus metabolic process	0.376271
GO:0045937~positive regulation of phosphate metabolic process	0.376271
GO:0030324~lung development	0.377254
GO:0051329~interphase of mitotic cell cycle	0.377259
GO:0007178~transmembrane receptor protein serine/threonine kinase signaling pathway	0.377259
GO:0030323~respiratory tube development	0.378227
GO:0043406~positive regulation of MAP kinase activity	0.378227
GO:0051173~positive regulation of nitrogen compound metabolic process	0.380532
GO:0001655~urogenital system development	0.381811
GO:0051325~interphase	0.381974
GO:0043408~regulation of MAPKKK cascade	0.382779
GO:0060541~respiratory system development	0.38377
GO:0046907~intracellular transport	0.384184
GO:0051052~regulation of DNA metabolic process	0.385233
GO:0010038~response to metal ion	0.401721
GO:0048511~rhythmic process	0.402792
GO:0031328~positive regulation of cellular biosynthetic process	0.403587
GO:0009891~positive regulation of biosynthetic process	0.404515
GO:0045137~development of primary sexual characteristics	0.40746
GO:0043405~regulation of MAP kinase activity	0.426212

## Sheet: module_9
GO term			KEGG pathway
Term	Benjamini		Term	Benjamini
GO:0007169~transmembrane receptor protein tyrosine kinase signaling pathway	2.6623e-11		hsa04630:Jak-STAT signaling pathway	4.23658e-05
GO:0007167~enzyme linked receptor protein signaling pathway	4.07252e-10		hsa05200:Pathways in cancer	0.000851412
GO:0032870~cellular response to hormone stimulus	1.32441e-08		hsa04012:ErbB signaling pathway	0.00279768
GO:0007243~protein kinase cascade	4.46909e-08		hsa04062:Chemokine signaling pathway	0.0195532
GO:0009725~response to hormone stimulus	5.27653e-08		hsa05221:Acute myeloid leukemia	0.0223961
GO:0010033~response to organic substance	5.39141e-08		hsa04920:Adipocytokine signaling pathway	0.0247708
GO:0009719~response to endogenous stimulus	6.01177e-08		hsa05120:Epithelial cell signaling in Helicobacter pylori infection	0.0218918
GO:0060397~JAK-STAT cascade involved in growth hormone signaling pathway	6.11682e-08		hsa05212:Pancreatic cancer	0.0214362
GO:0007259~JAK-STAT cascade	4.91035e-07		hsa05220:Chronic myeloid leukemia	0.0206508
GO:0060396~growth hormone receptor signaling pathway	6.84173e-07		hsa04540:Gap junction	0.0258989
GO:0018212~peptidyl-tyrosine modification	7.44776e-07		hsa04510:Focal adhesion	0.107499
GO:0060416~response to growth hormone stimulus	7.89167e-07		hsa05214:Glioma	0.240017
GO:0018108~peptidyl-tyrosine phosphorylation	7.95428e-07
GO:0007166~cell surface receptor linked signal transduction	8.48226e-07
GO:0043434~response to peptide hormone stimulus	8.71789e-07
GO:0006793~phosphorus metabolic process	1.15997e-05
GO:0006796~phosphate metabolic process	1.15997e-05
GO:0006468~protein amino acid phosphorylation	3.67299e-05
GO:0007242~intracellular signaling cascade	5.9488e-05
GO:0016310~phosphorylation	9.08557e-05
GO:0008284~positive regulation of cell proliferation	9.43623e-05
GO:0040014~regulation of multicellular organism growth	0.000205697
GO:0019221~cytokine-mediated signaling pathway	0.000297732
GO:0051272~positive regulation of cell motion	0.000783743
GO:0042592~homeostatic process	0.00136057
GO:0042127~regulation of cell proliferation	0.00157336
GO:0048008~platelet-derived growth factor receptor signaling pathway	0.00160674
GO:0030155~regulation of cell adhesion	0.00163407
GO:0010941~regulation of cell death	0.0016686
GO:0042981~regulation of apoptosis	0.00167894
GO:0043067~regulation of programmed cell death	0.00169783
GO:0050729~positive regulation of inflammatory response	0.00328115
GO:0048661~positive regulation of smooth muscle cell proliferation	0.00339648
GO:0051270~regulation of cell motion	0.00409761
GO:0048584~positive regulation of response to stimulus	0.00697315
GO:0048660~regulation of smooth muscle cell proliferation	0.0070662
GO:0051240~positive regulation of multicellular organismal process	0.00747384
GO:0051173~positive regulation of nitrogen compound metabolic process	0.00856066
GO:0045787~positive regulation of cell cycle	0.00970051
GO:0031328~positive regulation of cellular biosynthetic process	0.0102641
GO:0009891~positive regulation of biosynthetic process	0.0105723
GO:0032103~positive regulation of response to external stimulus	0.0113209
GO:0042698~ovulation cycle	0.0121035
GO:0050730~regulation of peptidyl-tyrosine phosphorylation	0.0121757
GO:0031349~positive regulation of defense response	0.0136939
GO:0050727~regulation of inflammatory response	0.0138876
GO:0051726~regulation of cell cycle	0.0141834
GO:0010647~positive regulation of cell communication	0.0142456
GO:0040008~regulation of growth	0.0145119
GO:0034097~response to cytokine stimulus	0.01468
GO:0046544~development of secondary male sexual characteristics	0.0158721
GO:0046777~protein amino acid autophosphorylation	0.0159673
GO:0030335~positive regulation of cell migration	0.0171451
GO:0040017~positive regulation of locomotion	0.0203241
GO:0032825~positive regulation of natural killer cell differentiation	0.0219771
GO:0032823~regulation of natural killer cell differentiation	0.0219771
GO:0001553~luteinization	0.0219771
GO:0046543~development of secondary female sexual characteristics	0.0219771
GO:0046449~creatinine metabolic process	0.0219771
GO:0050867~positive regulation of cell activation	0.0249901
GO:0030182~neuron differentiation	0.0259578
GO:0006549~isoleucine metabolic process	0.0276809
GO:0000255~allantoin metabolic process	0.0276809
GO:0001779~natural killer cell differentiation	0.0276809
GO:0042325~regulation of phosphorylation	0.0298583
GO:0006928~cell motion	0.0304715
GO:0048511~rhythmic process	0.0307544
GO:0045136~development of secondary sexual characteristics	0.0312497
GO:0045647~negative regulation of erythrocyte differentiation	0.0312497
GO:0006573~valine metabolic process	0.0312497
GO:0019530~taurine metabolic process	0.0312497
GO:0048732~gland development	0.0314679
GO:0032504~multicellular organism reproduction	0.0316411
GO:0048609~reproductive process in a multicellular organism	0.0316411
GO:0019220~regulation of phosphate metabolic process	0.031783
GO:0051174~regulation of phosphorus metabolic process	0.031783
GO:0043085~positive regulation of catalytic activity	0.035733
GO:0045588~positive regulation of gamma-delta T cell differentiation	0.0362537
GO:0046645~positive regulation of gamma-delta T cell activation	0.0362537
GO:0048541~Peyer's patch development	0.0362537
GO:0048537~mucosal-associated lymphoid tissue development	0.0362537
GO:0007260~tyrosine phosphorylation of STAT protein	0.0362537
GO:0046643~regulation of gamma-delta T cell activation	0.0362537
GO:0045586~regulation of gamma-delta T cell differentiation	0.0362537
GO:0007346~regulation of mitotic cell cycle	0.0378076
GO:0032101~regulation of response to external stimulus	0.040047
GO:0032816~positive regulation of natural killer cell activation	0.0403461
GO:0006101~citrate metabolic process	0.0403461
GO:0032814~regulation of natural killer cell activation	0.0403461
GO:0045579~positive regulation of B cell differentiation	0.0403461
GO:0006979~response to oxidative stress	0.0418982
GO:0048011~nerve growth factor receptor signaling pathway	0.0434791
GO:0030334~regulation of cell migration	0.0437617
GO:0050865~regulation of cell activation	0.0443337
GO:0044093~positive regulation of molecular function	0.0444635
GO:0001932~regulation of protein amino acid phosphorylation	0.0445336
GO:0001817~regulation of cytokine production	0.0454971
GO:0006105~succinate metabolic process	0.0456871
GO:0042104~positive regulation of activated T cell proliferation	0.0456871
GO:0006599~phosphagen metabolic process	0.0456871
GO:0006600~creatine metabolic process	0.0456871
GO:0051345~positive regulation of hydrolase activity	0.0456894
GO:0000165~MAPKKK cascade	0.0463624
GO:0006103~2-oxoglutarate metabolic process	0.0487829
GO:0006107~oxaloacetate metabolic process	0.0487829
GO:0040012~regulation of locomotion	0.0490547
GO:0048545~response to steroid hormone stimulus	0.0490547
GO:0045885~positive regulation of survival gene product expression	0.0568746
GO:0046006~regulation of activated T cell proliferation	0.0568746
GO:0045931~positive regulation of mitotic cell cycle	0.0568746
GO:0048812~neuron projection morphogenesis	0.0582833
GO:0045086~positive regulation of interleukin-2 biosynthetic process	0.0600491
GO:0045860~positive regulation of protein kinase activity	0.0620787
GO:0045597~positive regulation of cell differentiation	0.064509
GO:0033674~positive regulation of kinase activity	0.0648378
GO:0030097~hemopoiesis	0.0667428
GO:0051347~positive regulation of transferase activity	0.068121
GO:0045954~positive regulation of natural killer cell mediated cytotoxicity	0.0686735
GO:0045577~regulation of B cell differentiation	0.0686735
GO:0009081~branched chain family amino acid metabolic process	0.0686735
GO:0002717~positive regulation of natural killer cell mediated immunity	0.0686735
GO:0048858~cell projection morphogenesis	0.0692864
GO:0042269~regulation of natural killer cell mediated cytotoxicity	0.0712831
GO:0002715~regulation of natural killer cell mediated immunity	0.0712831
GO:0031175~neuron projection development	0.0736182
GO:0032990~cell part morphogenesis	0.0736182
GO:0045646~regulation of erythrocyte differentiation	0.0737752
GO:0019915~lipid storage	0.0737752
GO:0048534~hemopoietic or lymphoid organ development	0.0742289
GO:0045076~regulation of interleukin-2 biosynthetic process	0.0761574
GO:0002520~immune system development	0.0812421
GO:0045429~positive regulation of nitric oxide biosynthetic process	0.0814005
GO:0030101~natural killer cell activation	0.0814005
GO:0045884~regulation of survival gene product expression	0.0814005
GO:0043029~T cell homeostasis	0.0814005
GO:0001912~positive regulation of leukocyte mediated cytotoxicity	0.0814005
GO:0051094~positive regulation of developmental process	0.0815238
GO:0001775~cell activation	0.0847832
GO:0031399~regulation of protein modification process	0.0883186
GO:0009967~positive regulation of signal transduction	0.0883186
GO:0010604~positive regulation of macromolecule metabolic process	0.0895486
GO:0031343~positive regulation of cell killing	0.0898909
GO:0001910~regulation of leukocyte mediated cytotoxicity	0.0917469
GO:0000186~activation of MAPKK activity	0.0917469
GO:0040018~positive regulation of multicellular organism growth	0.0917469
GO:0044057~regulation of system process	0.0926232
GO:0033077~T cell differentiation in the thymus	0.09695
GO:0045428~regulation of nitric oxide biosynthetic process	0.09695
GO:0031341~regulation of cell killing	0.0994682
GO:0007595~lactation	0.0994682
GO:0007173~epidermal growth factor receptor signaling pathway	0.0994682
GO:0002260~lymphocyte homeostasis	0.0994682
GO:0030856~regulation of epithelial cell differentiation	0.101933
GO:0051336~regulation of hydrolase activity	0.103706
GO:0048666~neuron development	0.103925
GO:0032663~regulation of interleukin-2 production	0.104347
GO:0045638~negative regulation of myeloid cell differentiation	0.104347
GO:0045859~regulation of protein kinase activity	0.106354
GO:0045582~positive regulation of T cell differentiation	0.107203
GO:0060548~negative regulation of cell death	0.107559
GO:0002708~positive regulation of lymphocyte mediated immunity	0.108114
GO:0002705~positive regulation of leukocyte mediated immunity	0.108114
GO:0043648~dicarboxylic acid metabolic process	0.108114
GO:0043549~regulation of kinase activity	0.108519
GO:0043066~negative regulation of apoptosis	0.108643
GO:0043069~negative regulation of programmed cell death	0.108735
GO:0000902~cell morphogenesis	0.108853
GO:0045621~positive regulation of lymphocyte differentiation	0.109382
GO:0050871~positive regulation of B cell activation	0.109452
GO:0051338~regulation of transferase activity	0.109755
GO:0045944~positive regulation of transcription from RNA polymerase II promoter	0.110058
GO:0030030~cell projection organization	0.110147
GO:0046887~positive regulation of hormone secretion	0.110607
GO:0019218~regulation of steroid metabolic process	0.110607
GO:0001776~leukocyte homeostasis	0.110607
GO:0042102~positive regulation of T cell proliferation	0.116598
GO:0050796~regulation of insulin secretion	0.118524
GO:0006953~acute-phase response	0.118524
GO:0032989~cellular component morphogenesis	0.120512
GO:0002699~positive regulation of immune effector process	0.127717
GO:0045089~positive regulation of innate immune response	0.132174
GO:0002791~regulation of peptide secretion	0.132174
GO:0042593~glucose homeostasis	0.135352
GO:0033500~carbohydrate homeostasis	0.135352
GO:0043068~positive regulation of programmed cell death	0.135477
GO:0042108~positive regulation of cytokine biosynthetic process	0.135581
GO:0010942~positive regulation of cell death	0.135626
GO:0043065~positive regulation of apoptosis	0.135736
GO:0045580~regulation of T cell differentiation	0.139522
GO:0050864~regulation of B cell activation	0.139522
GO:0009755~hormone-mediated signaling	0.141098
GO:0033157~regulation of intracellular protein transport	0.142649
GO:0045088~regulation of innate immune response	0.144175
GO:0032355~response to estradiol stimulus	0.144175
GO:0002706~regulation of lymphocyte mediated immunity	0.144175
GO:0050671~positive regulation of lymphocyte proliferation	0.145677
GO:0043603~cellular amide metabolic process	0.147155
GO:0032946~positive regulation of mononuclear cell proliferation	0.147155
GO:0070665~positive regulation of leukocyte proliferation	0.147155
GO:0046822~regulation of nucleocytoplasmic transport	0.149082
GO:0032268~regulation of cellular protein metabolic process	0.149218
GO:0045893~positive regulation of transcription, DNA-dependent	0.149879
GO:0051254~positive regulation of RNA metabolic process	0.15012
GO:0002703~regulation of leukocyte mediated immunity	0.154209
GO:0042129~regulation of T cell proliferation	0.155556
GO:0022602~ovulation cycle process	0.155556
GO:0030879~mammary gland development	0.156883
GO:0045619~regulation of lymphocyte differentiation	0.156883
GO:0008585~female gonad development	0.15819
GO:0045471~response to ethanol	0.15819
GO:0030217~T cell differentiation	0.159478
GO:0048878~chemical homeostasis	0.160019
GO:0046883~regulation of hormone secretion	0.160747
GO:0032869~cellular response to insulin stimulus	0.16323
GO:0046545~development of primary female sexual characteristics	0.164445
GO:0046660~female sex differentiation	0.164445
GO:0045637~regulation of myeloid cell differentiation	0.165643
GO:0009611~response to wounding	0.165735
GO:0032386~regulation of intracellular transport	0.165855
GO:0046661~male sex differentiation	0.169137
GO:0042035~regulation of cytokine biosynthetic process	0.170269
GO:0050870~positive regulation of T cell activation	0.173466
GO:0032496~response to lipopolysaccharide	0.174553
GO:0045941~positive regulation of transcription	0.177874
GO:0045927~positive regulation of growth	0.178711
GO:0070663~regulation of leukocyte proliferation	0.183737
GO:0032944~regulation of mononuclear cell proliferation	0.183737
GO:0050670~regulation of lymphocyte proliferation	0.183755
GO:0010628~positive regulation of gene expression	0.183868
GO:0048871~multicellular organismal homeostasis	0.184711
GO:0002237~response to molecule of bacterial origin	0.185673
GO:0060191~regulation of lipase activity	0.186622
GO:0045935~positive regulation of nucleobase, nucleoside, nucleotide and nucleic acid metabolic process	0.201487
GO:0051251~positive regulation of lymphocyte activation	0.203631
GO:0042327~positive regulation of phosphorylation	0.203631
GO:0002526~acute inflammatory response	0.204442
GO:0048872~homeostasis of number of cells	0.207091
GO:0045937~positive regulation of phosphate metabolic process	0.207091
GO:0010562~positive regulation of phosphorus metabolic process	0.207091
GO:0032868~response to insulin stimulus	0.207091
GO:0002697~regulation of immune effector process	0.20787
GO:0043406~positive regulation of MAP kinase activity	0.208639
GO:0030098~lymphocyte differentiation	0.209398
GO:0010557~positive regulation of macromolecule biosynthetic process	0.209912
GO:0043627~response to estrogen stimulus	0.21089
GO:0042445~hormone metabolic process	0.211623
GO:0002696~positive regulation of leukocyte activation	0.211623
GO:0051047~positive regulation of secretion	0.215867
GO:0007565~female pregnancy	0.21656
GO:0008406~gonad development	0.218978
GO:0019216~regulation of lipid metabolic process	0.218978
GO:0032844~regulation of homeostatic process	0.221362
GO:0032147~activation of protein kinase activity	0.221362
GO:0051223~regulation of protein transport	0.221362
GO:0006790~sulfur metabolic process	0.22201
GO:0050863~regulation of T cell activation	0.224343
GO:0045449~regulation of transcription	0.224598
GO:0014070~response to organic cyclic substance	0.228917
GO:0070201~regulation of establishment of protein localization	0.228917
GO:0042110~T cell activation	0.235006
GO:0048608~reproductive structure development	0.235006
GO:0045137~development of primary sexual characteristics	0.235553
GO:0006357~regulation of transcription from RNA polymerase II promoter	0.23605
GO:0002521~leukocyte differentiation	0.240923
GO:0006470~protein amino acid dephosphorylation	0.243024
GO:0032880~regulation of protein localization	0.249824
GO:0043405~regulation of MAP kinase activity	0.253392
GO:0050778~positive regulation of immune response	0.258447
GO:0051249~regulation of lymphocyte activation	0.261897
GO:0010817~regulation of hormone levels	0.265297
GO:0007548~sex differentiation	0.265297
GO:0016311~dephosphorylation	0.268649
GO:0010876~lipid localization	0.271952

[truncated: 4 more sheets: module_10, module_11, module_12, module_13]
