# Supplementary material for: Identification of Gene and MicroRNA Signatures for Oral Cancer Developed from Oral Leukoplakia
Source: Biomed Res Int. 2015 May 3;2015:841956. doi: 10.1155/2015/841956 (PMC4433644; doi:10.1155/2015/841956)
Supplement: Supplementary file 1 — supplementary Table 1: Results of the functional enrichment analysis for the genes from each one of the 13 modules identified by us associated with oral cancer development. supplementary Table 2: 33 genes in the 13 modules identified by us associated with oral cancer development and their relevance score representing correlation degree with SCC provided by GeneCards. [file 841956.f1.zip › mat.841956.v2/supplementary table 2.xlsx]

## Sheet: Sheet1
Overlap with ”squamous carcinoma” list”
Gene symbol	Relevance score	Gene symbol	Relevance score	Gene symbol	Relevance score
TP53	10.63	JAK2	8.86	POU2F1	-0.89
EGFR	10.5	SKIL	8.86	CBL	-1.2
STAT3	9.95	NR3C1	8.8	PRKACA	-1.57
BRAF	9.87	SHC1	8.79
TOP1	9.74	STAT5B	8.72
SRC	9.68	HNRNPD	8.68
RAF1	9.66	PTPN11	8.64
PDGFRA	9.59	HES1	8.55
RARA	9.59	NCL	8.55
STAT1	9.52	PDGFRB	-0.07
CSNK2A1	9.39	SIRT1	-0.37
RAP1A	9.32	SNX1	-0.53
SFRP1	9.23	PTPN2	-0.55
STAT5A	9.07	WNT4	-0.77
INSR	8.86	PABPC1	-0.83
